# Supplementary material for: Advancing sustainability: a novel biopolymer-based degradable nanoclay composite film for next-generation packaging
Source: Royal Society of Chemistry journal article supplement (doi:10.1039/d4ma00476k), 2024-01-01
Supplement: d4ma00476k1.pdf [file d4ma00476k1.pdf]

# Advancing Sustainability: A Novel Biopolymer-based Degradable Nanoclay Composite Film for Next-Generation Packaging

## Graphical Abstract

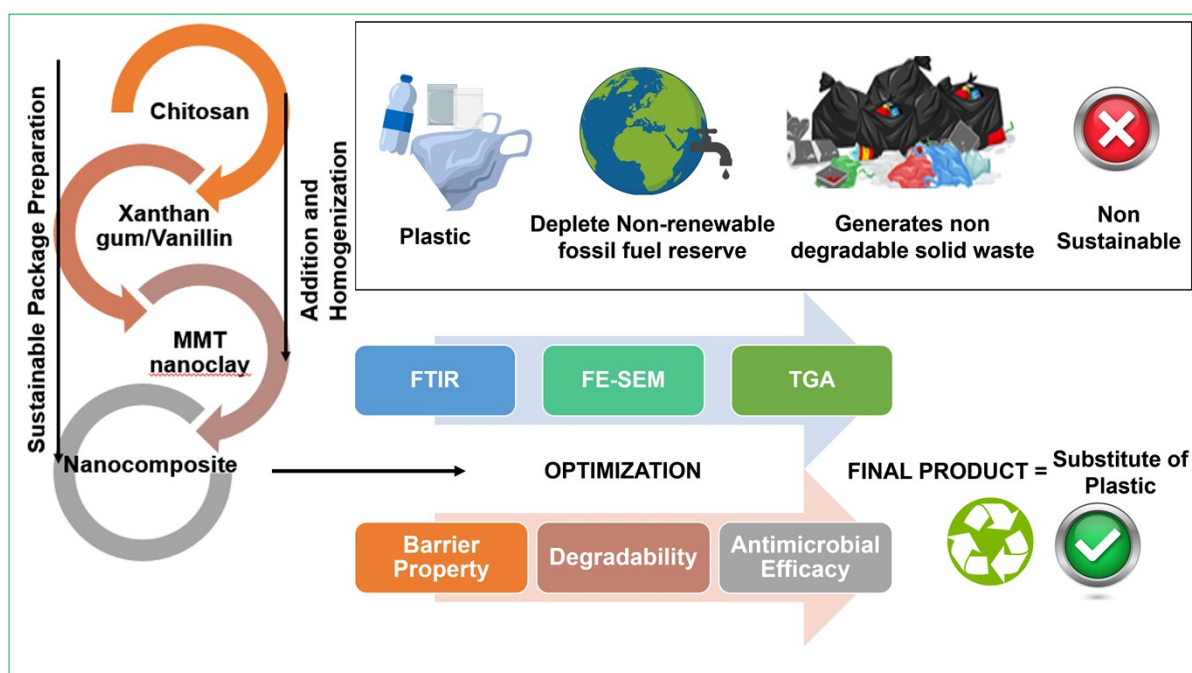

## Table of content

| S. No. | Content                            | Page no. |
|--------|------------------------------------|----------|
|        | Abstract                           | 1-2      |
|        | Keywords                           | 2        |
|        | Graphical Abstract                 | 2        |
| 1.     | Introduction                       | 2-3      |
| 2.     | Experimental Section               |          |
| 2.1    | Materials                          | 4        |
| 2.2    | Methodology                        | 4-       |
| 2.2.1  | Fabrication of Packaging Films     | 4-5      |
| 2.2.2  | Analytical Characterization        | 5-6      |
| 2.2.3  | Barrier Property                   | 6-7      |
| 2.2.4  | Water Absorbency and Degradability | 7        |
| 3.     | Result and Discussion              |          |
| 3.1    | Analytical Characterization        |          |

|     |                                         |       |
|-----|-----------------------------------------|-------|
|     | Thickness measurement                   | 9-10  |
|     | Transparency and Opacity                | 10-11 |
|     | FTIR analysis                           | 11-12 |
|     | Mechanical parameter analysis           | 12-13 |
|     | Thermal analysis                        | 13-14 |
|     | Surface Morphology analysis             | 14-16 |
| 3.2 | Barrier Ability of Fabricated Packaging |       |
|     | Water Vapor Barrier                     | 16-17 |
|     | Gas Barrier                             | 17    |
|     | UV Barrier                              | 17-18 |
| 3.3 | Water Absorbency and Degradability      |       |
|     | Water absorbance capacity               | 18-19 |
|     | Biodegradability                        | 19-20 |
| 4.  | Conclusion                              | 22    |
|     | Author Contribution                     | 22-23 |
|     | Conflicts of interest                   | 23    |
|     | Data Availability                       | 23    |
|     | Acknowledgements                        | 23    |
|     | References                              | 23-26 |
